# Supplementary material
Source: publisher site journal article supplement (https://static.cambridge.org/content/id/urn:cambridge.org:id:article:S037689291800005X/resource/name/S037689291800005Xsupp001.docx)
Supplement: Supplementary file 1 [file S037689291800005Xsupp001.docx]

Supplementary Materials (Online Appendix)

The following Supporting Materials may be found in the online version of this article:

**Table S1.**

**Summary statistics for provincial data.**

Seizure data (incl. total seizure reports, average logs seized, district with most cases) by province during January 2014 to April 2016. Other factors included are geographic (distance to border), economic (Gross Provincial Product) and environmental (forest cover).

(Word document, 153 kb)

Supplementary Materials (Online)

**Table S1.** **Summary statistics for provincial data.**

Seizure data (incl. total seizure reports, average logs seized, district with most cases) by province during January 2014 to April 2016. Other factors included are geographic (distance to border), economic (Gross Provincial Product) and environmental (forest cover).

| **No.** | **Province** | **Seizure number** | **Average logs per seizure** | **District with most cases** | **Distance to nearest land border (km)** | **Provincial population1** | **GPP1 (Thai baht)** | **Forest cover2 (km2)** |
| --- | --- | --- | --- | --- | --- | --- | --- | --- |
| 1 | Ubon Ratchathani | 201 | 76 | Buntarik | 22 | 1,730,304 | 60,568 | 2,851 |
| 2 | Sri Saket | 96 | 138 | Khun harn | 31 | 1,047,333 | 60,126 | 1,086 |
| 3 | Mookdaharn | 78 | 80 | Muang | 2 | 352,127 | 63,718 | 1,430 |
| 4 | Nakorn Panom | 57 | 68 | Tha uthein | 6 | 575,764 | 67,847 | 990 |
| 5 | Nakorn Ratchasima | 42 | 23 | Korn buri | 130 | 2,507,768 | 97,963 | 3,071 |
| 6 | Sa Kaew | 41 | 126 | Wattananakorn | 50 | 585,071 | 60,502 | 1,477 |
| 7 | Bung Karn | 34 | 72 | Bung klong | 14 | 356,293 | 63,426 | 288 |
| 8 | Trad | 27 | 25 | Muang | 13 | 258,944 | 140,763 | 900 |
| 9 | Buriram | 22 | 83 | Nang rong | 63 | 1,262,954 | 59,284 | 882 |
| 10 | Udon Thani | 22 | 73 | Mueng | 57 | 1,274,172 | 81,182 | 1,250 |
| 11 | Kalasin | 21 | 122 | Yang talad | 170 | 930,584 | 55,879 | 731 |
| 12 | Khon Kaen | 21 | 41 | Nam phong | 153 | 1,741,818 | 107,565 | 1,142 |
| 13 | Nong Kai | 21 | 84 | Ratanawaphee | 12 | 453,465 | 76,669 | 231 |
| 14 | Chantaburi | 18 | 397 | Laem sing | 82 | 510,704 | 200,699 | 2,101 |
| 15 | Surin | 16 | 117 | Bua ched | 25 | 1,117,579 | 59,299 | 660 |
| 16 | Chonburi | 15 | 218 | Sriracha | 180 | 1,609,883 | 439,975 | 562 |
| 17 | Prachinburi | 13 | 20 | Nadee | 130 | 574,770 | 371,776 | 1,418 |
| 18 | Rayong | 12 | 27 | Khao chamao | 139 | 855,778 | 1,008,615 | 314 |
| 19 | Sakon Nakorn | 12 | 201 | Phu phan | 98 | 818,917 | 60,759 | 1,753 |
| 20 | Amnat chareon | 11 | 1564 | Sena nikom | 55 | 280,963 | 54,678 | 365 |
| 21 | Roi Et | 10 | 62 | Muang | 156 | 1,079,249 | 61,933 | 312 |
| 22 | Nong Bua Lampoo | 7 | 22 | Muang | 90 | 479,823 | 43,385 | 431 |
| 23 | Chiang Rai | 6 | 89 | Chiang kong | 13 | 1,162,173 | 82,899 | 4,781 |
| 24 | Mahasarakam | 6 | 68 | Muang | 183 | 830,388 | 58,727 | 233 |
| 25 | Chachoengsao | 4 | 34 | Tha takieb | 80 | 751,301 | 423,965 | 819 |
| 26 | Yasothorn | 4 | 9 | Mueng | 120 | 485,483 | 53,120 | 344 |
| 27 | Bangkok | 3 | 58 | Bang khun thien | 175 | 8,515,212 | 481,118 | 1 |
| 28 | Chaiyaphum | 3 | 66 | Muang | 260 | 960,211 | 57,774 | 3,780 |
| 29 | Nakorn Pathom | 2 | 104 | Bang len | 144 | 1,001,077 | 256,501 | NA |
| 30 | Phra Nakorn Si Ayuthaya | 2 | 79 | Wang noi | 219 | 870,153 | 420,963 | NA |
| 31 | Saraburi | 2 | 68 | Kaeng koi | 235 | 717,454 | 289,998 | 760 |
| 32 | Chiang Mai | 1 | NA | Hang dong | 136 | 1,725,580 | 128,503 | 15,317 |
| 33 | Kanchanaburi | 1 | NA | Muang | 69 | 802,118 | 108,602 | 12,120 |
| 34 | Phang nga | 1 | NA | Ta kua pha | 220 | 263,615 | 161,681 | 1,754 |
| 35 | Samut Prakan | 1 | NA | Muang | 190 | 1,941,323 | 331,142 | 14 |
| 36 | Samut Sakorn | 1 | NA | Muang | 148 | 921,354 | 359,566 | 22 |
| 37 | Tak | 1 | NA | Pob phra | 12 | 515,762 | 86,506 | 12,464 |

1 The National Economic and Social Development Board (NESBD). (2014). Thailand GPP Per Province 1995-2014. Bangkok, Thailand.

2 Department of National Parks, Wildlife and Plant Conservation (DNP). (2014). ตาราง 1 พื้นที่ป่าไม้ แยกรายจังหวัด ปี พ.ศ. 2555 - 2556 [Table 1: Forest areas for each province]. Bangkok, Thailand.
